# Supplementary material for: Protonation and substitution reactions of [{WFe3S4Cl3}2(μ-L)3]3− (L = SEt or OMe): quantifying how metal content and spectator ligands individually affect reactivity
Source: Royal Society of Chemistry journal article supplement (doi:10.1039/b925835c), 2010-01-01
Supplement: b925835c.pdf [file b925835c.pdf]

## Supplementary Data

**Protonation and substitution reactions of  $[\{\text{WFe}_3\text{S}_4\text{Cl}_3\}_2(\mu\text{-L})_3]^{3-}$   
(L = SEt or OMe): quantifying how metal content and  
spectator ligands individually affect reactivity.**

B G Garrett and Richard A Henderson

## SUPPLEMENTARY DATA 1

Tables of dependence of  $k_{\text{obs}}$  on the concentrations of nucleophile and acids for the reactions of  $[\{\text{WFe}_3\text{S}_4\text{Cl}_3\}_2(\mu\text{-L})_3]^{3-}$  (L = SEt or MeO) in MeCN at 25 °C

**Table 1:** Kinetic data for the reactions of  $[\{\text{WFe}_3\text{S}_4\text{Cl}_3\}_2(\mu\text{-OMe})_3]^{3-}$  (0.025 mmol  $\text{dm}^{-3}$ ) with  $\text{PhS}^-$  in MeCN at 25 °C. Kinetics measured at  $\lambda = 500$  nm.

| $[\text{PhS}^-] / \text{mmol dm}^{-3}$ | $k_{\text{obs}} / \text{s}^{-1}$ | $k_{\text{obs}2} / \text{s}^{-1}$ |
|----------------------------------------|----------------------------------|-----------------------------------|
| 0.5                                    | 1.5                              | 0.17                              |
| 1.0                                    | 3.4                              | 0.26                              |
| 2.5                                    | 5.1                              | 0.51                              |
| 5.0                                    | 8.0                              | 1.2                               |
| 7.5                                    | 11.0                             | 1.75                              |
| 10.0                                   | 12.8                             | 2.6                               |
| 15.0                                   | 17.8                             | 3.2                               |
| 20.0                                   | 19.5                             | 4.5                               |
| 25.0                                   | 23.0                             | 5.5                               |
| 30.0                                   | 24.0                             | 6.1                               |
| 50.0                                   | 28.9                             | 10                                |

**Table 2:** Kinetic data for the reactions of [ $\{\text{WFe}_3\text{S}_4\text{Cl}_3\}_2(\mu\text{-SEt})_3\}^{3-}$  (0.025 mmol dm<sup>-3</sup>) with PhS<sup>-</sup> in MeCN at 25 °C. Kinetics measured at  $\lambda = 500$  nm.

| [PhS <sup>-</sup> ] / mmol dm <sup>-3</sup> | $k_{\text{obs}} / \text{s}^{-1}$ | $k_{\text{obs}2} / \text{s}^{-1}$ |
|---------------------------------------------|----------------------------------|-----------------------------------|
| 1.0                                         | 1.02                             | 0.04                              |
| 2.5                                         | 2.03                             | 0.07                              |
| 5.0                                         | 3.3                              | 0.15                              |
| 7.5                                         | 4.7                              | 0.18                              |
| 10.0                                        | 5.7                              | 0.33                              |
| 20.0                                        | 8.1                              | 0.52                              |
| 30.0                                        | 8.9                              | 0.72                              |
| 50.0                                        | 9.8                              | 1.2                               |

**Table 3:** Kinetic data for the reactions of  $[\{\text{WFe}_3\text{S}_4\text{Cl}_3\}_2(\mu\text{-OMe})_3]^{3-}$  (0.025 mmol  $\text{dm}^{-3}$ ) with  $\text{PhS}^-$  in the presence of  $[\text{NHEt}_3]^+$  in MeCN at 25 °C. Kinetics measured at  $\lambda = 500$  nm.

| $[\text{NHEt}_3^+]$<br>/ $\text{mmol dm}^{-3}$ | $[\text{PhS}^-]$<br>/ $\text{mmol dm}^{-3}$ | $[\text{NHEt}_3^+]/[\text{NEt}_3]$ | $k_{\text{obs}} / \text{s}^{-1}$ | $k_{\text{obs}2} / \text{s}^{-1}$ |
|------------------------------------------------|---------------------------------------------|------------------------------------|----------------------------------|-----------------------------------|
| 0.0                                            | 2.5                                         |                                    | 5.5                              | 0.55                              |
| 1.25                                           |                                             |                                    | 4.3                              | 0.33                              |
| 2.5                                            |                                             |                                    | 2.5                              | 0.23                              |
| 5.0                                            |                                             | 1                                  | 6.1                              | 1.24                              |
| 7.5                                            |                                             | 2                                  | 10.6                             | 1.8                               |
| 10.0                                           |                                             | 3                                  | 11.7                             | 2.4                               |
| 15.0                                           |                                             | 5                                  | 12.3                             | 3.0                               |
| 20.0                                           |                                             | 7                                  | 13.0                             | 3.3                               |
| 30.0                                           |                                             | 11                                 | 13.9                             | 3.7                               |
| 50.0                                           |                                             | 19                                 | 14.3                             | 3.75                              |
| 0.0                                            | 5.0                                         |                                    | 6.6                              | 0.63                              |
| 2.5                                            |                                             |                                    | 5.2                              | 0.32                              |
| 5.0                                            |                                             |                                    | 3.3                              | 0.25                              |
| 6.25                                           |                                             | 0.25                               | 5.1                              | 0.67                              |
| 7.5                                            |                                             | 0.5                                | 7.9                              | 0.83                              |
| 8.75                                           |                                             | 0.75                               | 9.2                              | 1.3                               |
| 10.0                                           |                                             | 1                                  | 10.4                             | 1.5                               |
| 15.0                                           |                                             | 2                                  | 14                               | 1.8                               |
| 30.0                                           |                                             | 5                                  | 18                               | 2.8                               |
| 50.0                                           |                                             | 9                                  | 20                               | 3.5                               |

**Table 4:** Kinetic data for the reactions of  $[\{\text{WFe}_3\text{S}_4\text{Cl}_3\}_2(\mu\text{-OMe})_3]^{3-}$  (0.025 mmol  $\text{dm}^{-3}$ ) with  $\text{PhS}^-$  in the presence of  $[\text{NHEt}_3]^+$  in MeCN at 25 °C at a constant ratio of  $[\text{NHEt}_3^+]/[\text{NEt}_3] = 5$ . Kinetics measured at  $\lambda = 500$  nm.

| $[\text{NHEt}_3^+]$<br>/ $\text{mmol dm}^{-3}$ | $[\text{PhS}^-]$<br>/ $\text{mmol dm}^{-3}$ | $[\text{PhSH}]_e$<br>/ $\text{mmol dm}^{-3}$ | $k_{\text{obs}} / \text{s}^{-1}$ | $k_{\text{obs}2} / \text{s}^{-1}$ |
|------------------------------------------------|---------------------------------------------|----------------------------------------------|----------------------------------|-----------------------------------|
| 6.0                                            | 1.0                                         | 1.0                                          | 7.4                              | 2.5                               |
| 9.0                                            | 1.5                                         | 1.5                                          | 8                                | 2.8                               |
| 15.0                                           | 2.5                                         | 2.5                                          | 13                               | 3.0                               |
| 21.0                                           | 3.5                                         | 3.5                                          | 14.5                             | 2.6                               |
| 30.0                                           | 5.0                                         | 5.0                                          | 19.3                             | 3.2                               |

**Table 5:** Kinetic data for the reactions of [ $\{\text{WFe}_3\text{S}_4\text{Cl}_3\}_2(\mu\text{-SEt}_3)\}^{3-}$  (0.025 mmol dm<sup>-3</sup>) with PhS<sup>-</sup> in the presence of [NH<sub>4</sub>Et<sub>3</sub>]<sup>+</sup> in MeCN at 25 °C. Kinetics measured at  $\lambda = 500$  nm.

| [NH <sub>4</sub> Et <sub>3</sub> <sup>+</sup> ]<br>/ mmol dm <sup>-3</sup> | [PhS <sup>-</sup> ]<br>/ mmol dm <sup>-3</sup> | [NH <sub>4</sub> Et <sub>3</sub> <sup>+</sup> ]/[NEt <sub>3</sub> ] | $k_{\text{obs}} / \text{s}^{-1}$ | $k_{\text{obs}2} / \text{s}^{-1}$ |
|----------------------------------------------------------------------------|------------------------------------------------|---------------------------------------------------------------------|----------------------------------|-----------------------------------|
| 0.0                                                                        | 2.5                                            |                                                                     | 2.2                              | 0.65                              |
| 1.0                                                                        |                                                |                                                                     | 1.36                             | 0.65                              |
| 2.5                                                                        |                                                |                                                                     | 0.9                              | 0.20                              |
| 5.0                                                                        |                                                | 1                                                                   | 2.7                              | 0.72                              |
| 6.0                                                                        |                                                | 1.4                                                                 | 3.1                              | 0.75                              |
| 7.5                                                                        |                                                | 2                                                                   | 4.1                              | 0.82                              |
| 10.0                                                                       |                                                | 3                                                                   | 5                                | 0.88                              |
| 20.0                                                                       |                                                | 7                                                                   | 5.3                              | 0.98                              |
| 30.0                                                                       |                                                | 11                                                                  | 5.6                              | 1.30                              |
| 50.0                                                                       |                                                | 19                                                                  | 5.9                              | 1.35                              |
| 0.0                                                                        | 5.0                                            |                                                                     | 2.6                              | 0.62                              |
| 1.0                                                                        |                                                |                                                                     | 2.1                              | 0.45                              |
| 2.5                                                                        |                                                |                                                                     | 1.7                              | 0.43                              |
| 5.0                                                                        |                                                |                                                                     | 0.8                              | 0.20                              |
| 6.0                                                                        |                                                | 0.2                                                                 | 2.3                              | 0.60                              |
| 7.5                                                                        |                                                | 0.3                                                                 | 4.4                              | 0.73                              |
| 10.0                                                                       |                                                | 1                                                                   | 5.1                              | 1.2                               |
| 20.0                                                                       |                                                | 3                                                                   | 8.1                              | 1.8                               |
| 30.0                                                                       |                                                | 5                                                                   | 9                                | 2.1                               |
| 50.0                                                                       |                                                | 9                                                                   | 10                               | 2.2                               |

**Table 6:** Kinetic data for the reactions of [ $\{\text{WFe}_3\text{S}_4\text{Cl}_3\}_2(\mu\text{-SEt})_3\}^{3-}$  (0.025 mmol dm<sup>-3</sup>) with PhS<sup>-</sup> in the presence of [NH<sub>4</sub>E<sub>3</sub>]<sup>+</sup> in MeCN at 25 °C at a constant ratio of [NH<sub>4</sub>E<sub>3</sub>]<sup>+</sup>/[NEt<sub>3</sub>] = 3. Kinetics measured at  $\lambda = 500$  nm.

| [NH <sub>4</sub> E <sub>3</sub> ] <sup>+</sup><br>/ mmol dm <sup>-3</sup> | [PhS <sup>-</sup> ]<br>/ mmol dm <sup>-3</sup> | [PhSH] <sub>e</sub><br>/ mmol dm <sup>-3</sup> | $k_{\text{obs}} / \text{s}^{-1}$ | $k_{\text{obs}2} / \text{s}^{-1}$ |
|---------------------------------------------------------------------------|------------------------------------------------|------------------------------------------------|----------------------------------|-----------------------------------|
| 2.0                                                                       | 0.5                                            | 0.5                                            | 1.2                              | 0.18                              |
| 4.0                                                                       | 1.0                                            | 1.0                                            | 2.4                              | 0.57                              |
| 8.0                                                                       | 2.0                                            | 2.0                                            | 3.4                              | 0.83                              |
| 10.0                                                                      | 2.5                                            | 2.5                                            | 4.9                              | 0.88                              |
| 16.0                                                                      | 4.0                                            | 4.0                                            | 7.1                              | 1.05                              |
| 20.0                                                                      | 5.0                                            | 5.0                                            | 8.7                              | 1.8                               |



**Table 7:** Kinetic data for the reactions of  $[\{\text{WFe}_3\text{S}_4\text{Cl}_3\}_2(\mu\text{-OMe})_3]^{3-}$  (0.025 mmol  $\text{dm}^{-3}$ ) with  $\text{PhS}^-$  in the presence of  $[\text{pyrrH}]^+$  in MeCN at 25 °C. Kinetics measured at  $\lambda = 400$  nm.

| $[\text{pyrrH}^+] / \text{mmol dm}^{-3}$ | $[\text{PhS}^-] / \text{mmol dm}^{-3}$ | $k_{\text{obs}} / \text{s}^{-1}$ | $k_{\text{obs}2} / \text{s}^{-1}$ |
|------------------------------------------|----------------------------------------|----------------------------------|-----------------------------------|
| 1.25                                     | 1.25                                   | 1.68                             | 0.08                              |
| 2.5                                      |                                        | 1.84                             | 0.16                              |
| 5.0                                      |                                        | 2                                | 0.30                              |
| 10.0                                     |                                        | 2.5                              | 0.70                              |
| 20.0                                     |                                        | 3.1                              | 1.0                               |
| 30.0                                     |                                        | 3.5                              | 2.3                               |
| 1.25                                     | 2.5                                    | 3.2                              | 0.12                              |
| 2.5                                      |                                        | 3.5                              | 0.26                              |
| 5.0                                      |                                        | 4.0                              | 0.62                              |
| 10.0                                     |                                        | 5.0                              | 1.2                               |
| 20.0                                     |                                        | 6.2                              | 2.5                               |
| 30.0                                     |                                        | 6.3                              | 3.5                               |
| 1.25                                     | 5.0                                    | 6.0                              | 0.22                              |
| 2.5                                      |                                        | 6.8                              | 0.7                               |
| 5.0                                      |                                        | 8.1                              | 1.33                              |
| 10.0                                     |                                        | 10                               | 2.5                               |
| 20.0                                     |                                        | 13.6                             | 4.6                               |
| 30.0                                     |                                        | 13.0                             | 8.0                               |

**Table 8:** Kinetic data for the reactions of [ $\{\text{WFe}_3\text{S}_4\text{Cl}_3\}_2(\mu\text{-SEt})_3\}^{3-}$  (0.025 mmol dm<sup>-3</sup>) with PhS<sup>-</sup> in the presence of [pyrrH]<sup>+</sup> in MeCN at 25 °C. Kinetics measured at  $\lambda = 400$  nm.

| [pyrrH <sup>+</sup> ] / mmol dm <sup>-3</sup> | [PhS <sup>-</sup> ] / mmol dm <sup>-3</sup> | $k_{\text{obs}} / \text{s}^{-1}$ | $k_{\text{obs}2} / \text{s}^{-1}$ |
|-----------------------------------------------|---------------------------------------------|----------------------------------|-----------------------------------|
| 1.0                                           | 2.5                                         | 1.36                             | 0.04                              |
| 2.5                                           |                                             | 1.50                             | 0.07                              |
| 5.0                                           |                                             | 1.67                             | 0.16                              |
| 10.0                                          |                                             | 1.88                             |                                   |
| 20.0                                          |                                             | 2.08                             | 0.55                              |
| 40.0                                          |                                             | 2.25                             | 1.2                               |
| 1.0                                           | 5.0                                         | 2.7                              | 0.07                              |
| 2.5                                           |                                             | 3.0                              | 0.18                              |
| 5.0                                           |                                             | 3.4                              | 0.34                              |
| 10.0                                          |                                             | 3.8                              | 0.6                               |
| 20.0                                          |                                             | 4.1                              | 1.0                               |
| 40.0                                          |                                             | 4.7                              | 2.1                               |

## SUPPLEMENTARY DATA 2

Graphs of the kinetic data shown in Tables 1 – 8 used to determine the rate laws of the reactions of  $[\{\text{WFe}_3\text{S}_4\text{Cl}_3\}_2(\mu\text{-L})_3]^{3-}$  (L = SEt or MeO) in MeCN at 25 °C.

*(All curves drawn through the data are those defined by the corresponding experimental rate law shown in Supplementary Data 3)*

1. Plots of  $k_{\text{obs}}$  versus  $[\text{PhS}^-]$  for the reaction of  $[\{\text{WFe}_3\text{S}_4\text{Cl}_3\}_2(\mu\text{-OMe})_3]^{3-}$  (0.025 mmol  $\text{dm}^{-3}$ ) with  $\text{PhS}^-$  in MeCN at 25 °C. The kinetics for phase 1 is shown in the top graph and the kinetics for phase 2 is shown in the bottom graph.

#### PHASE 1

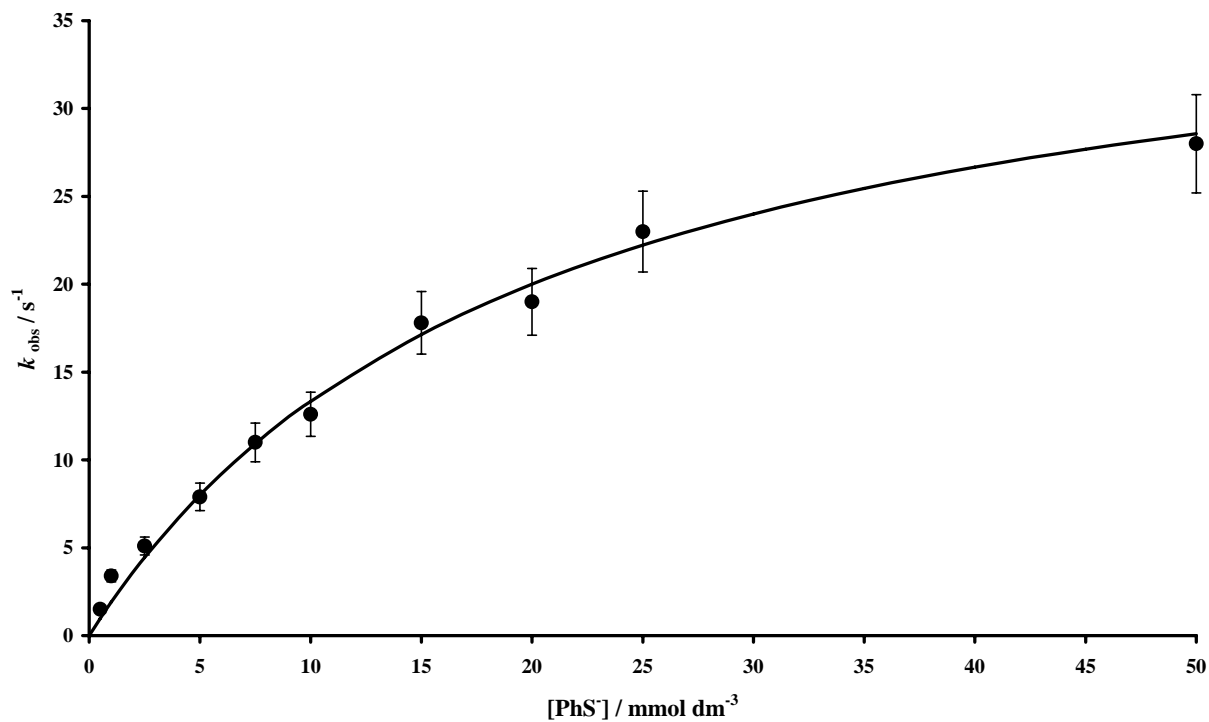

#### PHASE 2

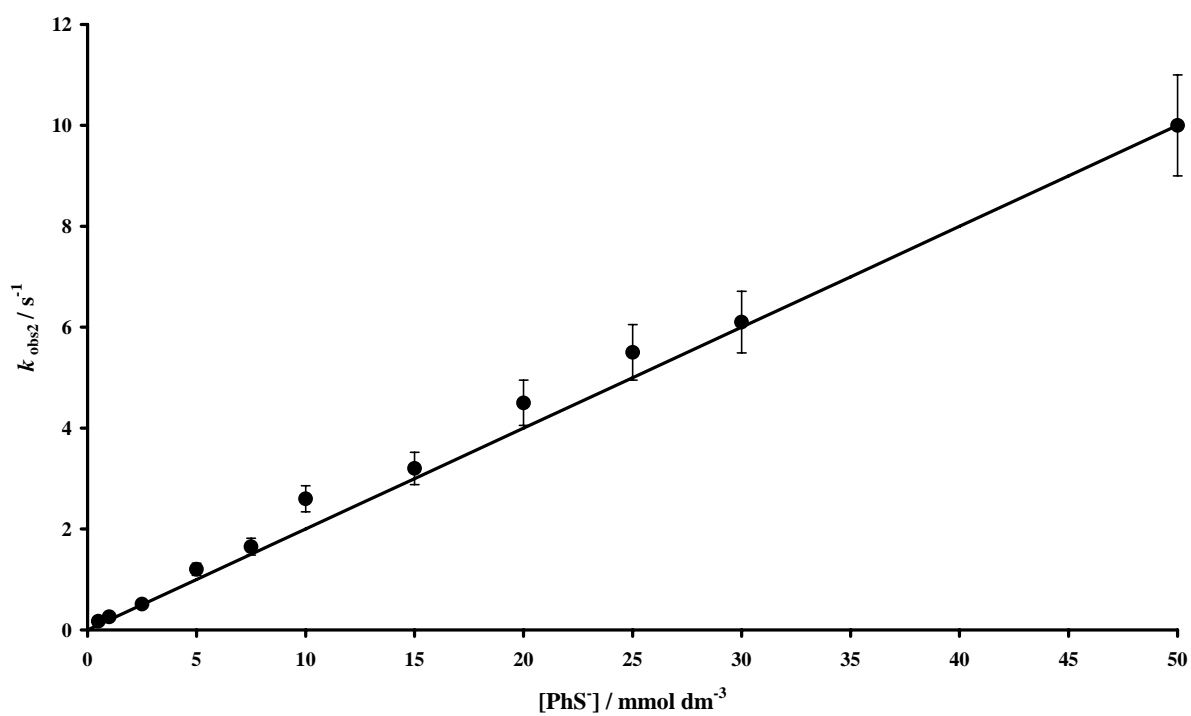

2. Plots of  $k_{\text{obs}}$  versus  $[\text{PhS}^-]$  for the reaction of  $[\{\text{WFe}_3\text{S}_4\text{Cl}_3\}_2(\mu\text{-SEt})_3]^{3-}$  ( $0.025 \text{ mmol dm}^{-3}$ ) with  $\text{PhS}^-$  in MeCN at  $25^\circ\text{C}$ . The kinetics for phase 1 is shown in the top graph and the kinetics for phase 2 is shown in the bottom graph.

PHASE 1 (Figure 3 in text)

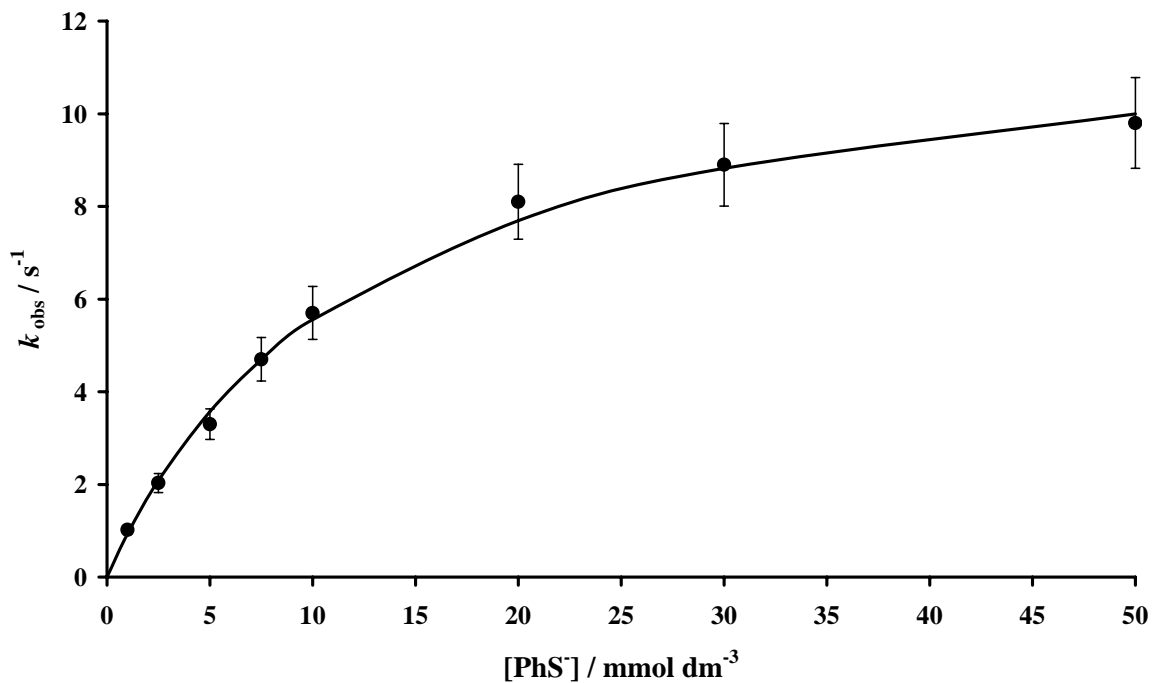

PHASE 2

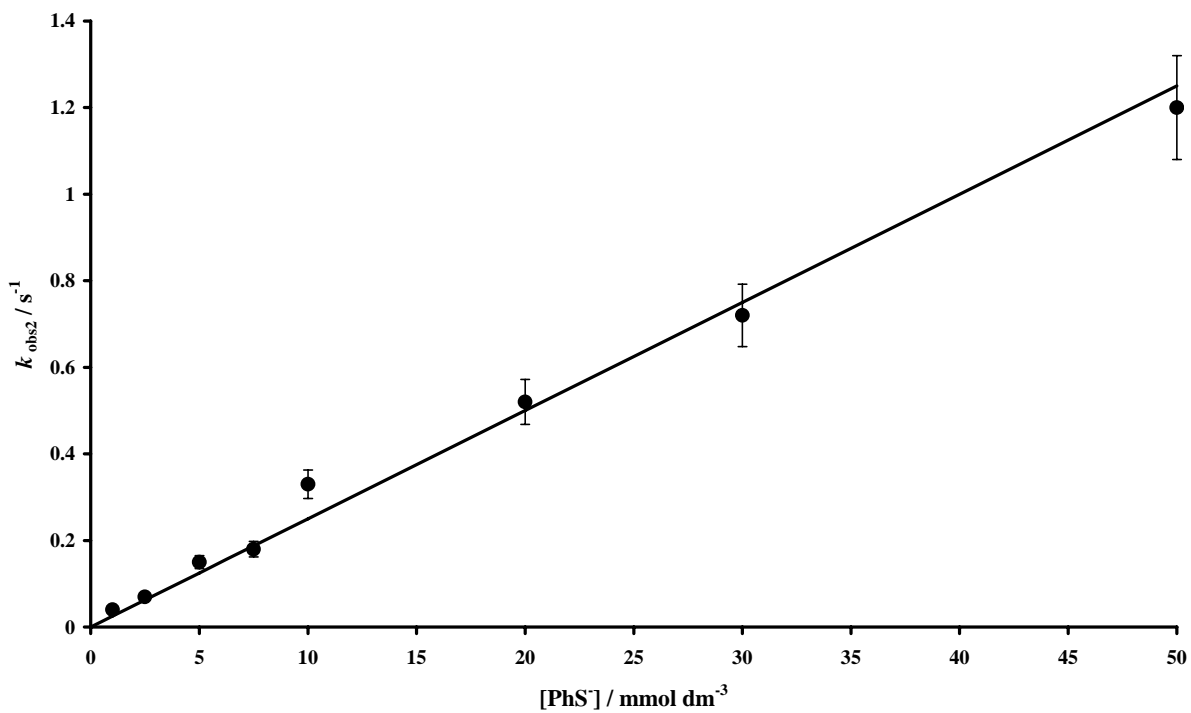

3. Plots of  $k_{\text{obs}}$  versus  $[\text{NHEt}_3^+]/[\text{NEt}_3]$  for the reaction of  $[\{\text{WFe}_3\text{S}_4\text{Cl}_3\}_2(\mu\text{-OMe})_3]^{3-}$  ( $0.025 \text{ mmol dm}^{-3}$ ) with  $\text{PhS}^-$  in the presence of an excess of  $[\text{NHEt}_3^+]$  in MeCN at  $25^\circ\text{C}$ . The kinetics for phase 1 is shown in the top graph and the kinetics for phase 2 is shown in the bottom graph. The data points correspond to  $[\text{PhSH}] = 2.5$  ( $\bullet$ ) and  $[\text{PhSH}] = 5.0 \text{ mmol dm}^{-3}$  ( $\blacktriangle$ ). In insert for phase 1, data show the dependence of  $k_{\text{obs}}$  on  $[\text{PhSH}]$ , at constant  $[\text{NHEt}_3^+]/[\text{NEt}_3] = 5.0$  ( $\blacksquare$ ).

PHASE 1 (Figure 7 in text)

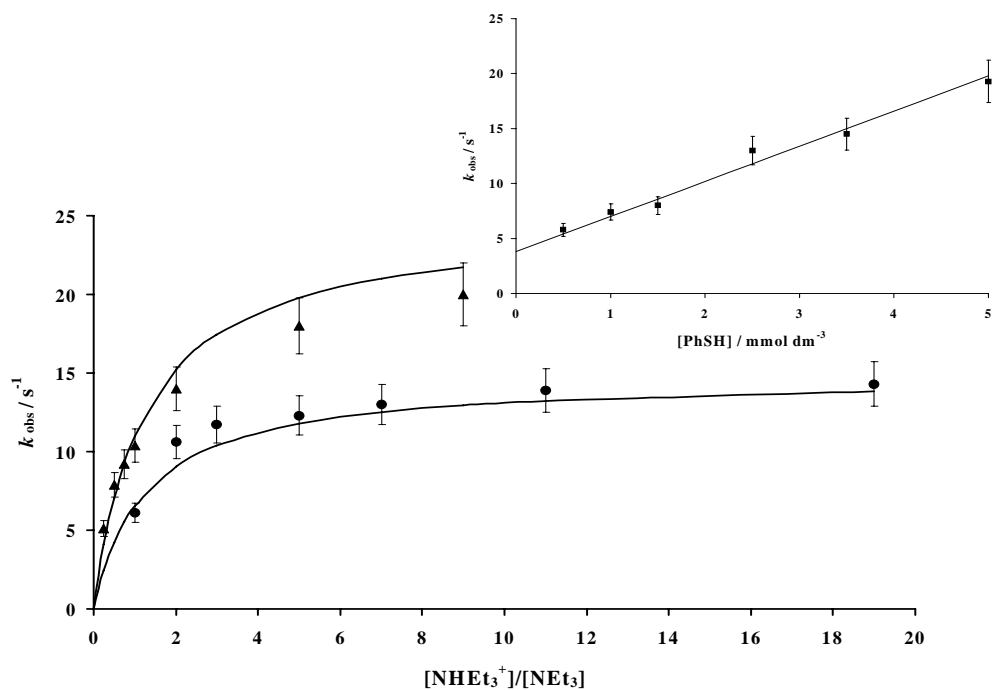

PHASE 2

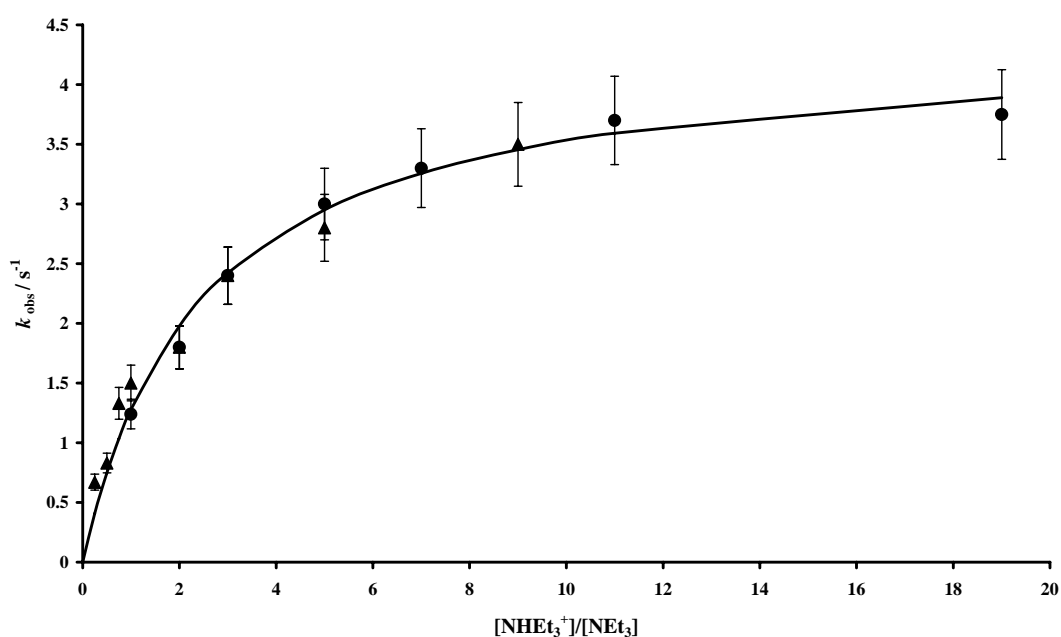

4. Plots of  $k_{\text{obs}}/[\text{PhSH}]$  versus  $[\text{NHEt}_3^+]/[\text{NEt}_3]$  for the reaction of  $[\{\text{WFe}_3\text{S}_4\text{Cl}_3\}_2(\mu\text{-SEt})_3]^{3-}$  ( $0.025 \text{ mmol dm}^{-3}$ ) with  $\text{PhS}^-$  in the presence of an excess of  $[\text{NHEt}_3]^+$  in MeCN at  $25^\circ\text{C}$ . The kinetics for phase 1 is shown in the top graph and the kinetics for phase 2 is shown in the bottom graph. The data points correspond to  $[\text{PhSH}] = 2.5 \text{ mmol dm}^{-3}$  ( $\bullet$ ) and  $[\text{PhSH}] = 5.0 \text{ mmol dm}^{-3}$  ( $\blacksquare$ ).

PHASE 1 (Figure 5 in text)

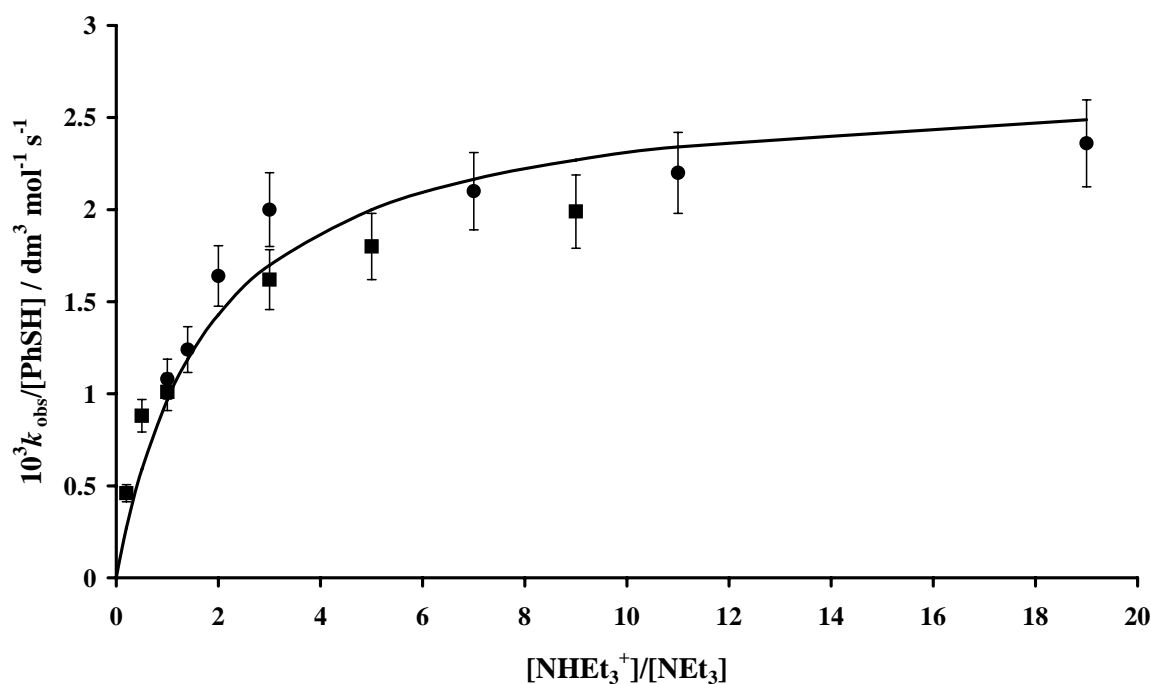

PHASE 2

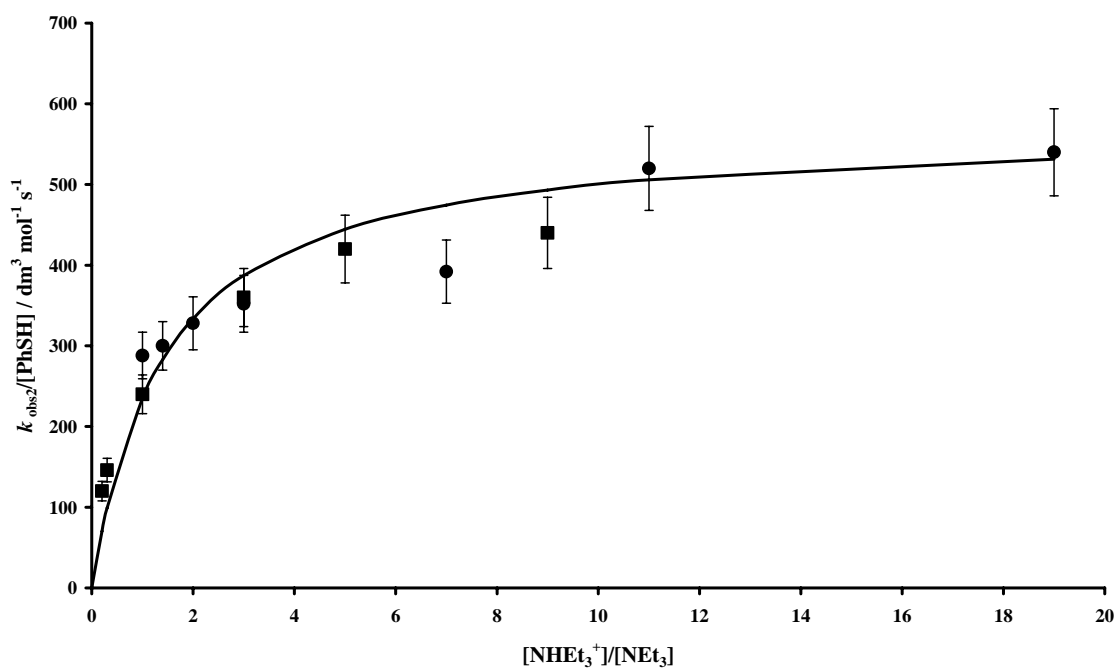

5. Plots of  $k_{\text{obs}}/[\text{PhS}^-]$  versus  $[\text{pyrH}^+]$  for the reaction of  $[\{\text{WFe}_3\text{S}_4\text{Cl}_3\}_2(\mu\text{-OMe})_3]^{3-}$  ( $0.025 \text{ mmol dm}^{-3}$ ) with  $\text{PhS}^-$  in the presence of  $\text{pyrH}^+$  in MeCN at  $25^\circ\text{C}$ . The kinetics for phase 1 is shown in the top graph and the kinetics for phase 2 is shown in the bottom graph. Data points correspond to  $[\text{PhS}^-] = 1.25 \text{ mmol dm}^{-3}$ ,  $[\text{PhS}^-] = 2.5 \text{ mmol dm}^{-3}$  ( $\bullet$ ) and  $[\text{PhS}^-] = 5.0 \text{ mmol dm}^{-3}$  ( $\blacksquare$ ).

#### PHASE 1

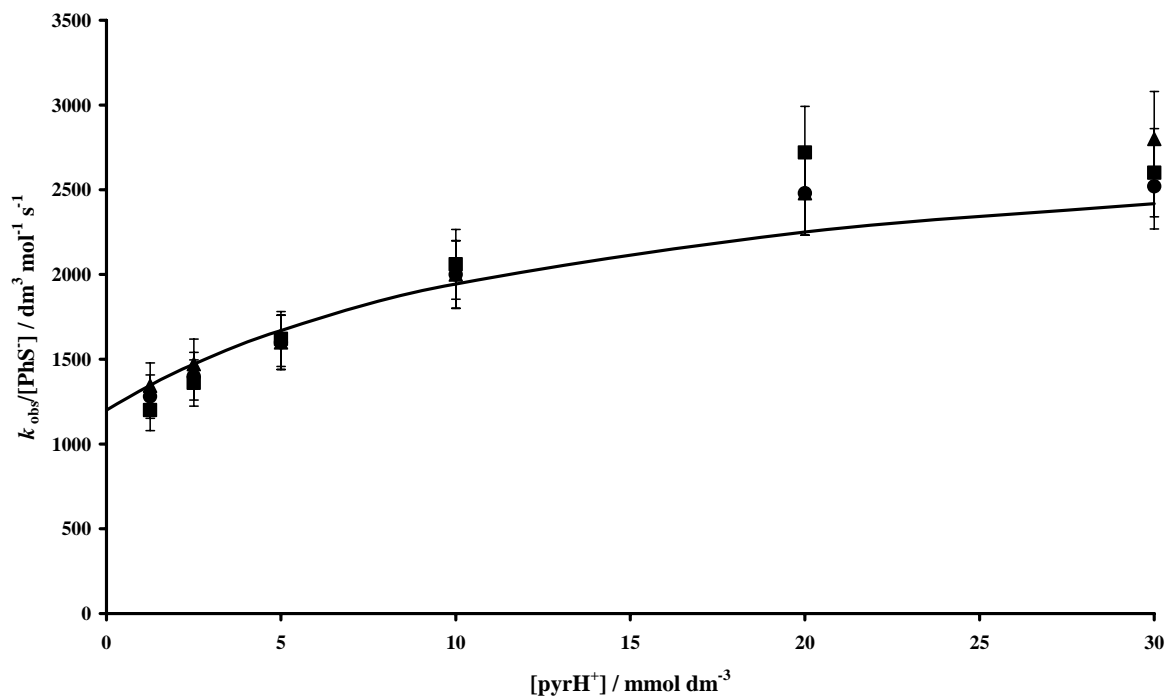

#### PHASE 2

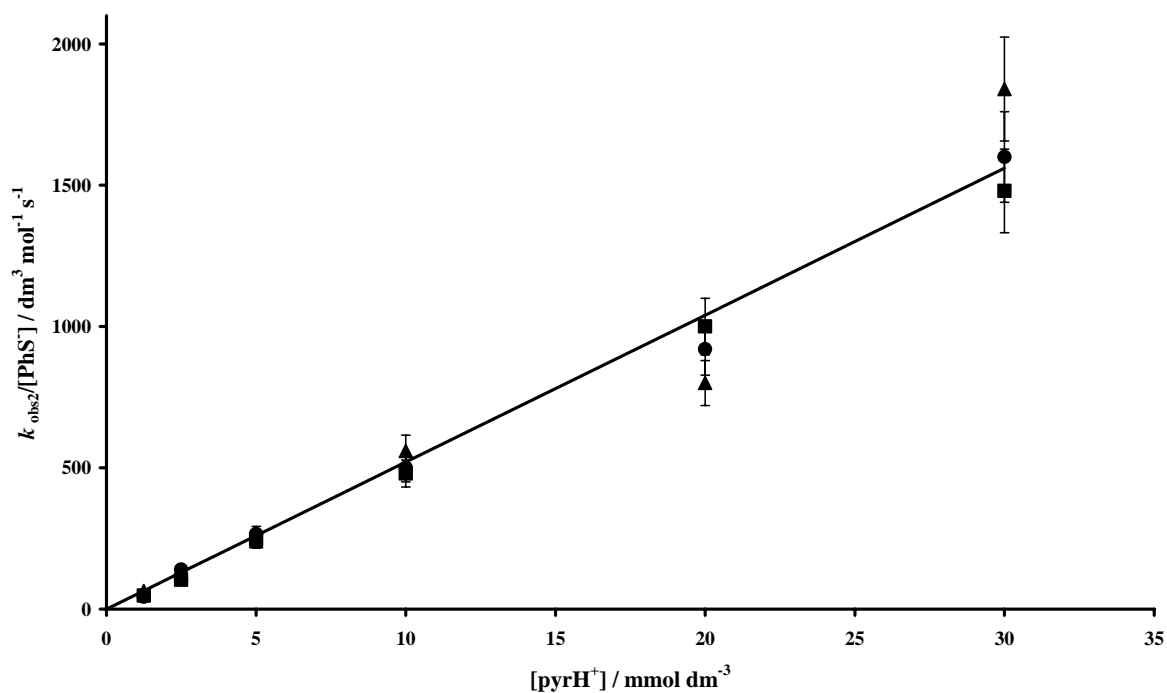



6. Plots of  $k_{\text{obs}}/[\text{PhS}^-]$  versus  $[\text{pyrH}^+]$  for the reaction of  $[\{\text{WFe}_3\text{S}_4\text{Cl}_3\}_2(\mu\text{-SEt})_3]^{3-}$  ( $0.025 \text{ mmol dm}^{-3}$ ) with  $\text{PhS}^-$  in the presence of  $\text{pyrH}^+$  in MeCN at  $25^\circ\text{C}$ . The kinetics for phase 1 is shown in the top graph and the kinetics for phase 2 is shown in the bottom graph. Data points correspond to  $[\text{PhS}^-] = 2.5 \text{ mmol dm}^{-3}$  ( $\bullet$ ) and  $[\text{PhS}^-] = 5.0 \text{ mmol dm}^{-3}$  ( $\blacksquare$ ).

PHASE 1 (Figure 8 in text)

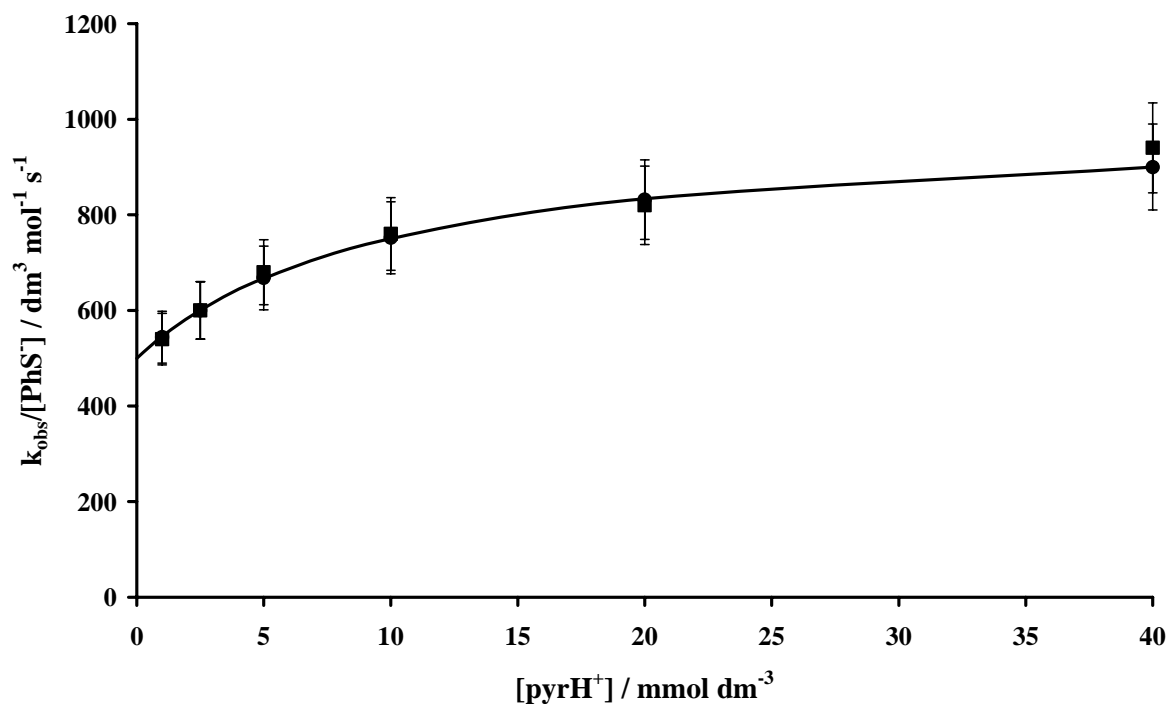

PHASE 2

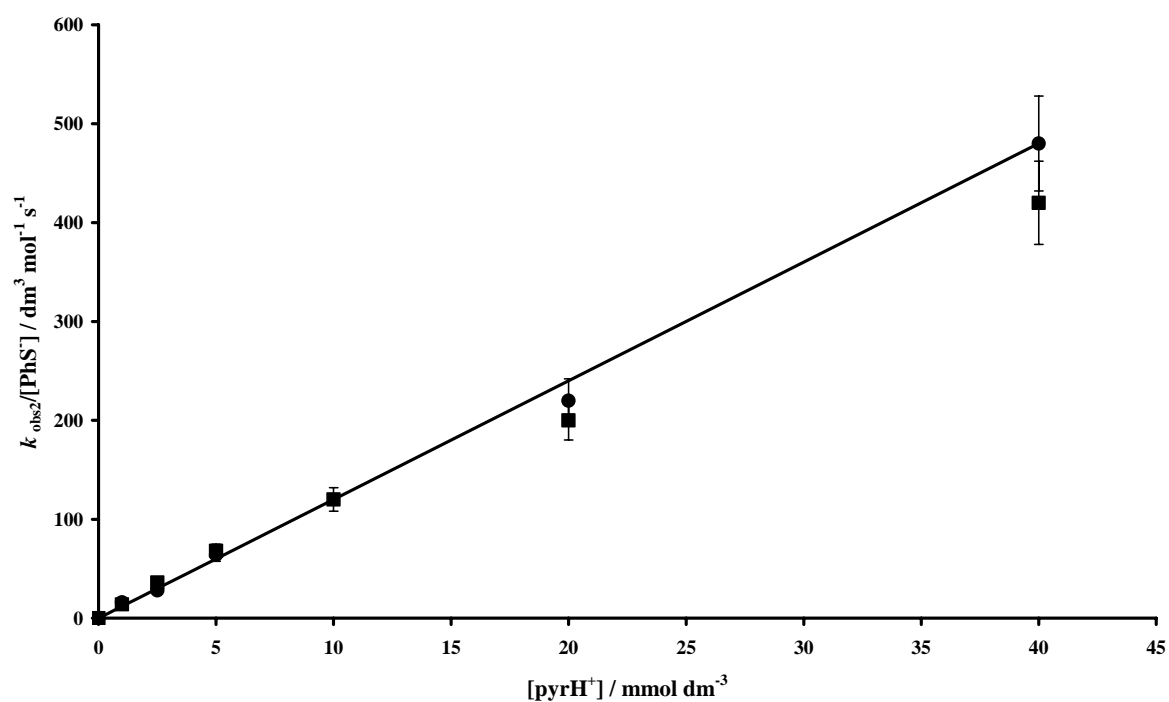

### SUPPLEMENTARY DATA 3

Rate laws for first and second phases of the reactions of  $[\{\text{WFe}_3\text{S}_4\text{Cl}_3\}_2(\mu\text{-L})_3]^{3-}$  (L = SEt or MeO) in MeCN at 25 °C

**A. Rate Laws for the reactions of  $[\{\text{WFe}_3\text{S}_4\text{Cl}_3\}_2(\mu\text{-OMe})_3]^{3-}$ .**

**(i) Reaction with  $\text{PhS}^-$**

Phase 1:

$$\text{Rate} = \frac{2 \times 10^3 [\text{PhS}^-][\text{WFeS}]}{1 + 50[\text{PhS}^-]}$$

Phase 2:

$$\text{Rate} = 2 \times 10^2 [\text{PhS}^-][\text{WFeS}]$$

**(ii) Reaction with  $\text{PhS}^-$  in the presence of an excess of  $[\text{NHEt}_3]^+$**

Phase 1:

$$\text{Rate} = \frac{\{(4 + 3.2 \times 10^3 [\text{PhSH}])[\text{NHEt}_3^+]/[\text{NEt}_3]\}[\text{WFeS}]}{1 + 0.8[\text{NHEt}_3^+]/[\text{NEt}_3]}$$

Phase 2:

$$\text{Rate} = \frac{\{1.8[\text{NHEt}_3^+]/[\text{NEt}_3]\}[\text{WFeS}]}{1 + 0.41[\text{NHEt}_3^+]/[\text{NEt}_3]}$$

**(iii) Reaction with  $\text{PhS}^-$  in the presence of  $[\text{pyrH}]^+$**

Phase 1:

$$\text{Rate} = \frac{(1.2 \times 10^3 + 2.13 \times 10^5 [\text{pyrH}^+])[\text{PhS}^-][\text{WFeS}]}{1 + 71.3[\text{pyrH}^+]}$$

Phase 2:

$$\text{Rate} = 5.2 \times 10^4 [\text{PhS}^-][\text{pyrH}^+][\text{W}_2]$$

**B. Rate Laws for the reactions of  $[\{\text{WFe}_3\text{S}_4\text{Cl}_3\}_2(\mu\text{-SEt})_3]^{3-}$ .**

**(i) Reaction with  $\text{PhS}^-$**

Phase 1:

$$\text{Rate} = \frac{1 \times 10^3 [\text{PhS}^-][\text{WFeS}]}{1 + 80[\text{PhS}^-]}$$

Phase 2:

$$\text{Rate} = 25[\text{PhS}^-][\text{WFeS}]$$

**(ii) Reaction with  $\text{PhS}^-$  in the presence of an excess of  $[\text{NHEt}_3]^+$**

Phase 1:

$$\text{Rate} = \frac{\{1.5 \times 10^3 [\text{PhSH}][\text{NHEt}_3^+]/[\text{NEt}_3]\} [\text{WFeS}]}{1 + 0.55[\text{NHEt}_3^+]/[\text{NEt}_3]}$$

Phase 2:

$$\text{Rate} = \frac{\{350 [\text{PhSH}][\text{NHEt}_3^+]/[\text{NEt}_3]\} [\text{WFeS}]}{1 + 0.6[\text{NHEt}_3^+]/[\text{NEt}_3]}$$

**(iii) Reaction with  $\text{PhS}^-$  in the presence of  $[\text{pyrH}]^+$**

Phase 1:

$$\text{Rate} = \frac{(500 + 1.0 \times 10^5 [\text{pyrH}^+]) [\text{PhS}^-][\text{WFeS}]}{1 + 1.0 \times 10^2 [\text{pyrH}^+]}$$

Phase 2:

$$\text{Rate} = 1.2 \times 10^4 [\text{PhS}^-][\text{pyrH}^+][\text{WFeS}]$$
